# Supplementary material for: CD8+ NKs as a potential biomarker of complete response and survival with lenalidomide plus R-GDP in the R2-GDP-GOTEL trial in recurrent/refractory diffuse large B cell lymphoma
Source: PubMed Central journal article supplement (PMC10926187; doi:10.3389/fimmu.2024.1293931), 2024-02-26
Supplement: DataSheet_1.pdf [file DataSheet_1.pdf]

# SUPPLEMENTAL FIGURES

**A**

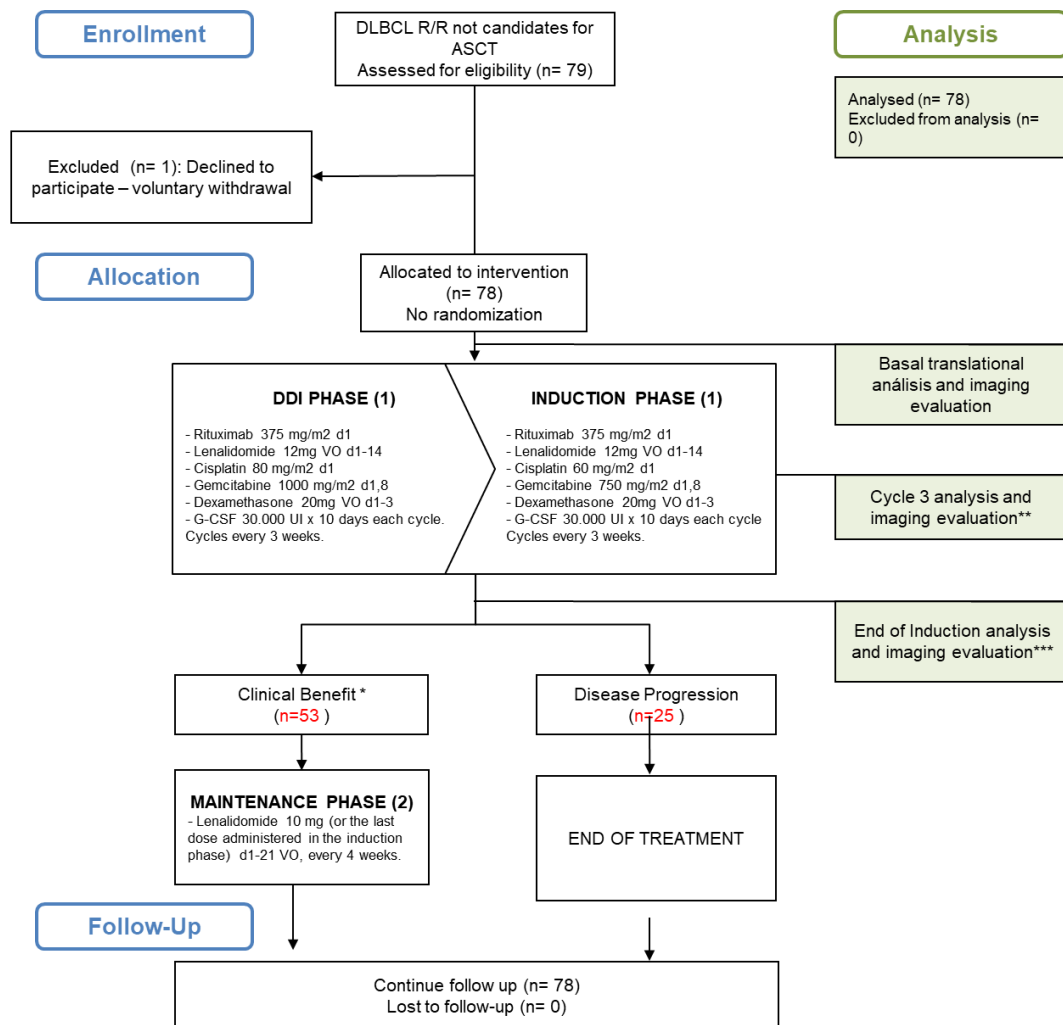

\* Clinical Benefit understood as complete response (CR), partial response (PR) or stable disease (SD).

\*\* CT scan

\*\*\* PET scan

(1) If after the 3<sup>rd</sup> cycle there was no progression of disease, a maximum of 6 induction cycles were administered.

(2) Patients that reached clinical benefit after at least 3 cycles of induction phase of treatment could enter a maintenance phase.

**B**

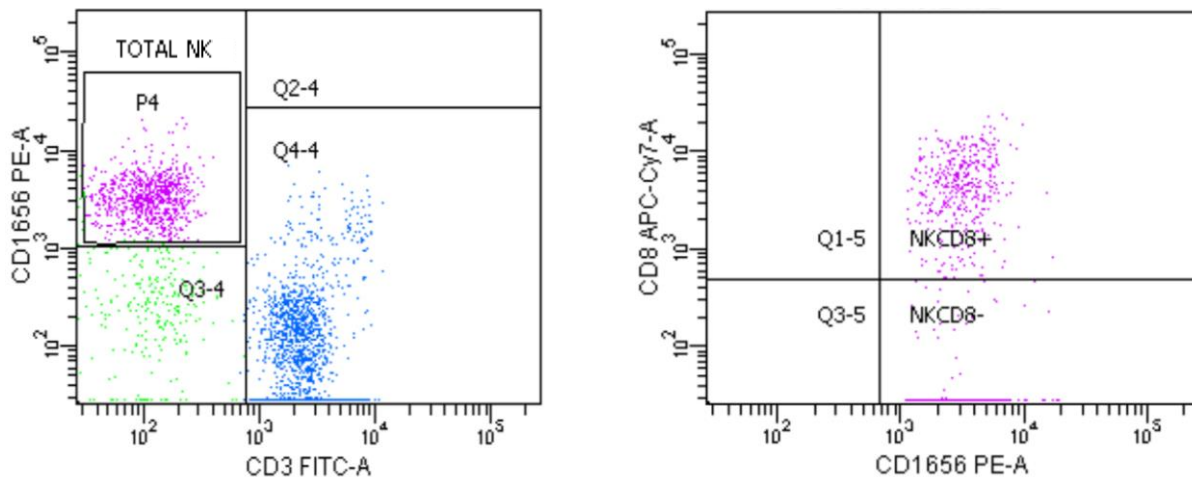

**Figure S1: A. Consort Flow Diagram. B. Gating of CD8+ NK populations by flow cytometry.**

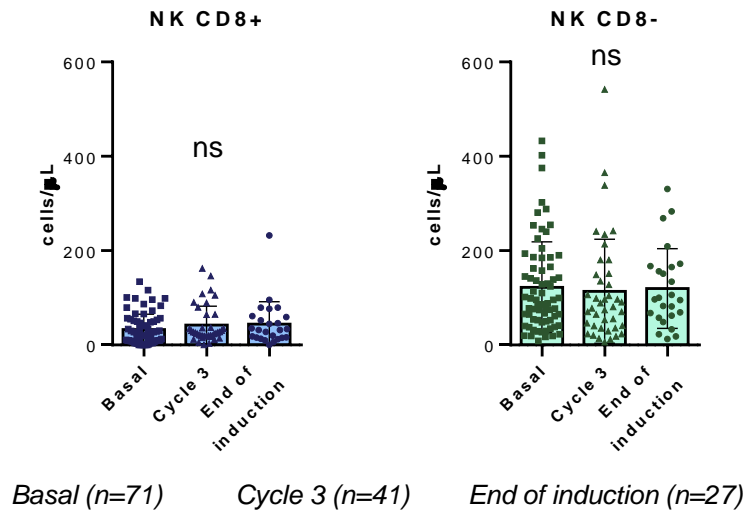

**Figure S2:** Study of both subpopulations before (baseline), during (Cycle 3) and after treatment (End of induction) in all R/R DLBCL patients.

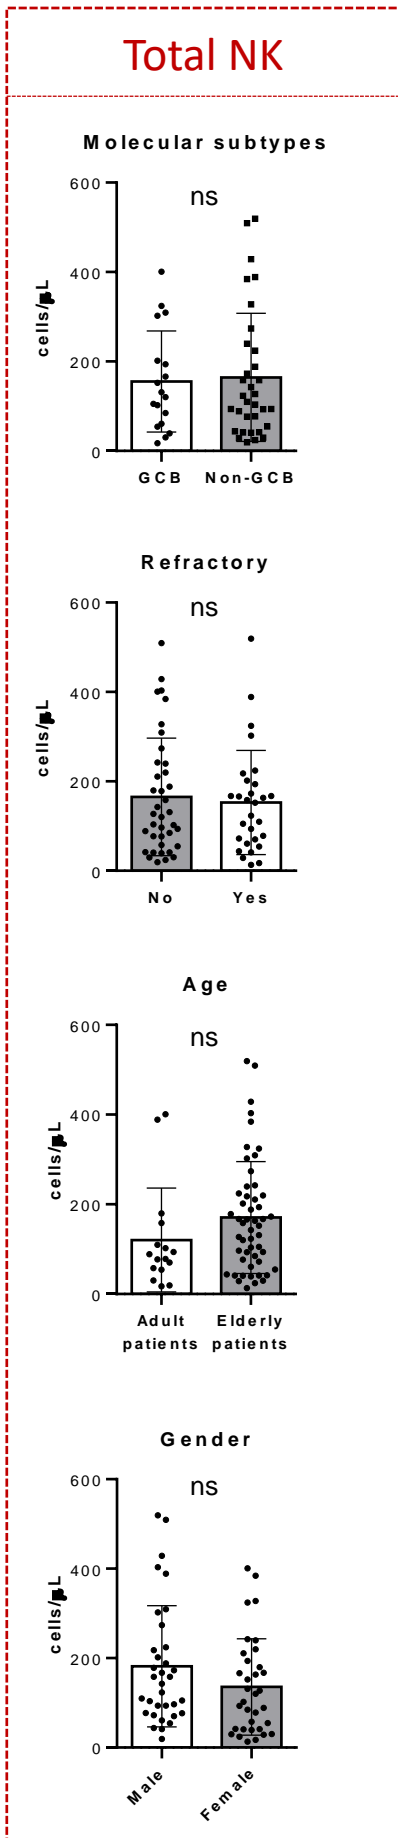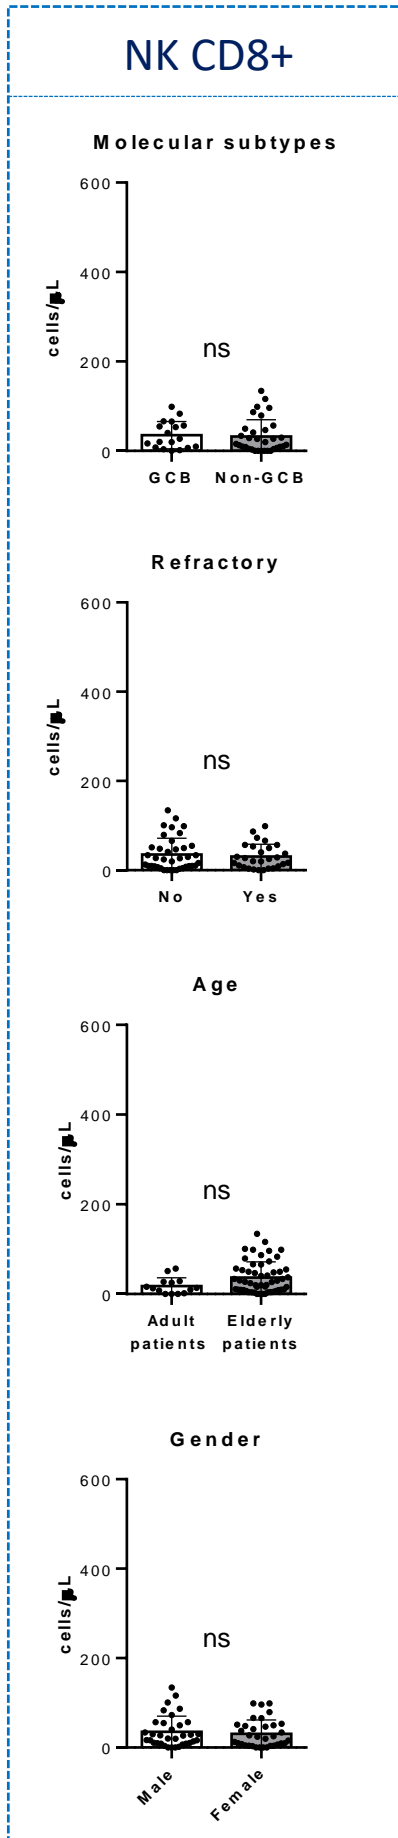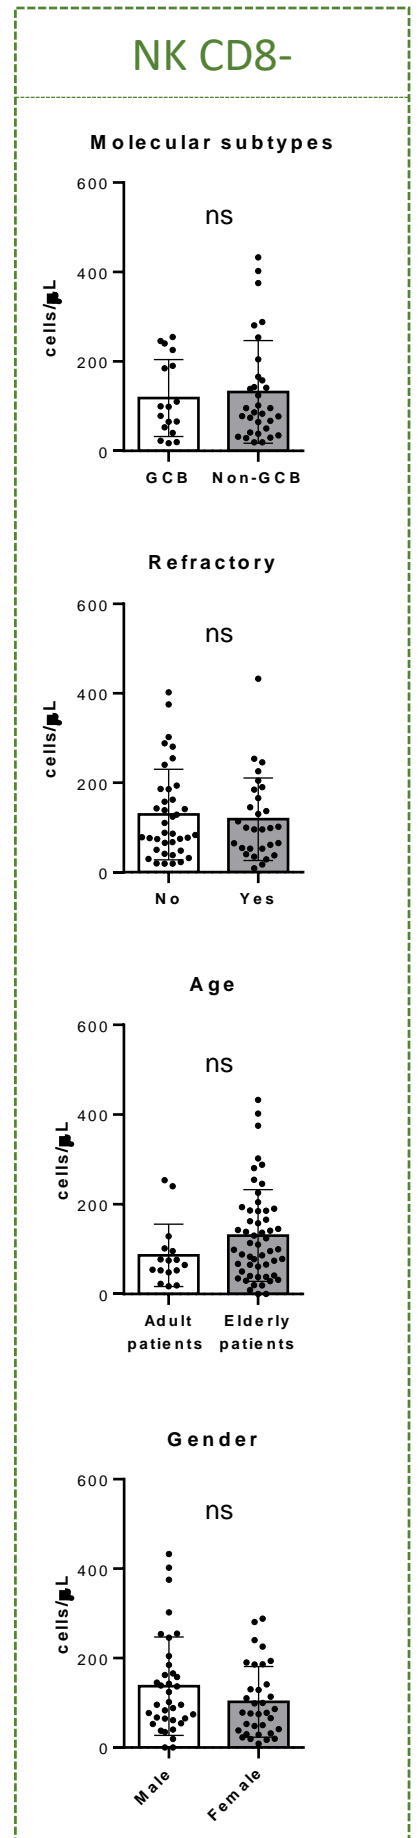

**Figure S3:** Analysis of the number of total NKs, CD8+ NKs and CD8- NKs in relation to clinical parameters.

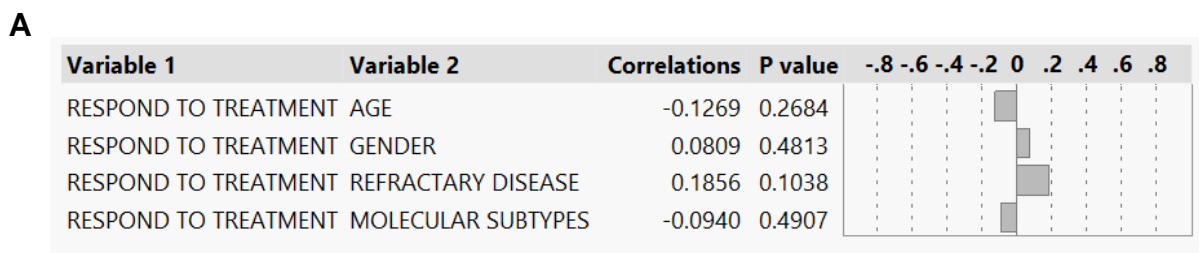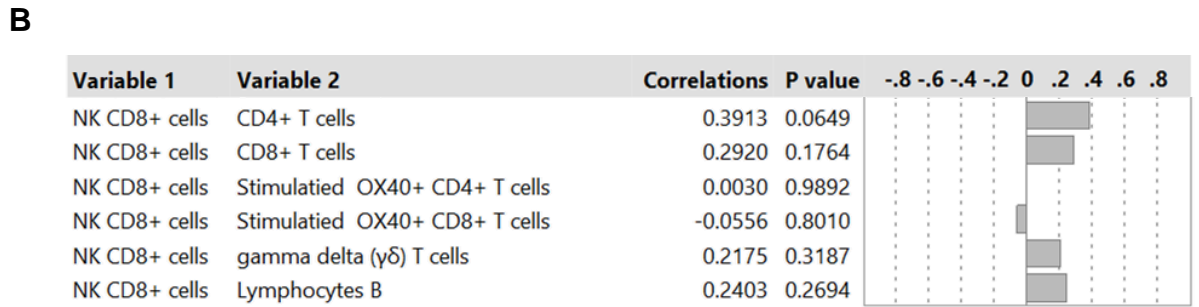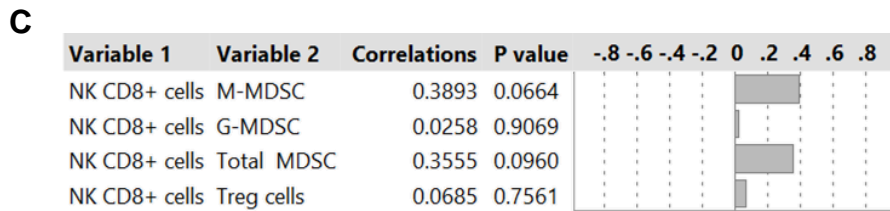

**Figure S4: A.** Multivariate correlations between response to treatment and clinical parameters in all R/R DLBCL patients. **B.** Multivariate correlations between CD8+ NKs and protumor immune cells in R/R DLBCL patients with PD. **C.** Multivariate correlations between CD8+ NKs and antitumor immune cells in R/R DLBCL patients with PD.

## SUPPLEMENTAL TABLE

**Supplemental Table 1.** Summary of clinical characteristics of R/R DLBCL patients.

| Characteristics                 |              |
|---------------------------------|--------------|
| Patients                        | 79           |
| Median age (range, years)       | 66.9 (23–86) |
| Gender                          |              |
| Male                            | 41 (51.9%)   |
| Female                          | 38 (48.1%)   |
| Disease                         |              |
| Refractory                      | 33 (41.8%)   |
| Relapse (non-refractory)        | 46 (58.2%)   |
| Molecular subtypes              |              |
| GCB                             | 20 (25.3%)   |
| Non-GCB                         | 36 (45.6%)   |
| Not determined                  | 23 (29.1%)   |
| Response to treatment           |              |
| Complete response (CR)          | 29 (36.7%)   |
| Partial response (PR)           | 18 (22.8%)   |
| Stable disease (SD)             | 6 (7.6%)     |
| Progression of the disease (PD) | 25 (31.6%)   |
| Not determined                  | 1 (1.3%)     |

**Supplemental Table 2.** Monoclonal antibodies used in immunophenotyping for R/R DLBCL patients.

| Monoclonal antibodies                                                                                                        | Reference  |
|------------------------------------------------------------------------------------------------------------------------------|------------|
| PerCP-Cy5.5 Mouse Anti-Human CD45                                                                                            | no. 564105 |
| APC-Cy7 Mouse Anti-Human CD3                                                                                                 | no. 560176 |
| TBNK (including CD3 FITC / CD16 PE + CD56 PE / CD45 PerCP-Cy™5.5 / CD4 PE-Cy™7 / CD19 APC / CD8 APC-Cy™7)                    | no. 644611 |
| PE-Cy7 Mouse Anti-Human CD4                                                                                                  | no. 557852 |
| PerCP-Cy5.5 Mouse Anti-Human CD8                                                                                             | no. 565310 |
| APC-Cy7 Rat Anti-CD11b                                                                                                       | no. 557657 |
| PE Mouse Anti-Human CD33                                                                                                     | no. 555450 |
| FITC Mouse Anti-Human CD14                                                                                                   | no. 555397 |
| APC Mouse Anti-Human CD15                                                                                                    | no. 551376 |
| PE-Cy7 Mouse Anti-Human HLA-DR                                                                                               | no. 560651 |
| FITC Mouse Anti-Human CD134 (OX40)                                                                                           | no.555837  |
| APC Mouse Anti-Human PD-1 (CD279)                                                                                            | no. 558694 |
| Human regulatory T cell cocktail (including PerCP Mouse Anti-Human CD4, PE Mouse Anti-Human CD127, and FITC Anti-Human CD25) | no. 560249 |

**Supplemental Table 3.** Cell surface marker phenotype of each immune cell subset assessed by flow cytometry.

| Immune cells             | Phenotype                                              |
|--------------------------|--------------------------------------------------------|
| Anti-tumoral cells       |                                                        |
| Total NK                 | CD3- CD16+ CD56+                                       |
| NK CD8+                  | CD3- CD16+ CD56+ CD8+                                  |
| NK CD8-                  | CD3- CD16+ CD56+ CD8-                                  |
| Lymphocytes T            | CD3+ CD4+                                              |
|                          | CD3+ CD8+                                              |
|                          | CD3+ CD4- CD8-                                         |
| Lymphocytes B            | CD19+                                                  |
| Stimulated OX40+ T cells | CD3+ CD4+ OX40+ PD-1-                                  |
|                          | CD3+ CD8+ OX40+ PD-1-                                  |
| Pro-tumoral cells        |                                                        |
| M-MDSCs                  | CD45+ CD11b+ CD33+ HLA-DR <sup>low/-</sup> CD14+ CD15- |
| G-MDSCs                  | CD45+ CD11b+ CD33 HLA-DR <sup>low/-</sup> CD14- CD15+  |
| Tregs                    | CD4+ CD25 <sup>high</sup> CD127 <sup>low/-</sup>       |
| Total Leukocytes         | CD45+                                                  |

**Supplemental Table 4. Sensitivity and specificity of ROC curve analysis in CD8+ NKs.**

| <b>Coordinates of the ROC Curve NK CD8+</b>       |             |                 |
|---------------------------------------------------|-------------|-----------------|
| Test Result Variable(s):                          |             |                 |
| Positive if Greater Than or Equal To <sup>a</sup> | Sensitivity | 1 - Specificity |
| -1.0000                                           | 1.000       | 1.000           |
| 0.8500                                            | 0.923       | 0.886           |
| 2.4500                                            | 0.885       | 0.886           |
| 3.4000                                            | 0.885       | 0.864           |
| 3.7000                                            | 0.885       | 0.841           |
| 4.0000                                            | 0.846       | 0.841           |
| 4.3000                                            | 0.846       | 0.818           |
| 4.6000                                            | 0.846       | 0.795           |
| 5.6500                                            | 0.846       | 0.773           |
| 6.7000                                            | 0.846       | 0.750           |
| 7.2500                                            | 0.846       | 0.727           |
| 8.1500                                            | 0.846       | 0.705           |
| 8.7500                                            | 0.846       | 0.682           |
| 8.9000                                            | 0.846       | 0.659           |
| 9.3000                                            | 0.846       | 0.636           |
| 10.0000                                           | 0.808       | 0.591           |
| 10.6000                                           | 0.808       | 0.568           |
| 11.7500                                           | 0.808       | 0.545           |
| 13.2000                                           | 0.769       | 0.545           |
| 14.6000                                           | 0.769       | 0.523           |
| 15.8500                                           | 0.769       | 0.500           |
| 16.5000                                           | 0.769       | 0.455           |
| 18.2000                                           | 0.769       | 0.432           |
| 19.7000                                           | 0.769       | 0.409           |
| 20.0000                                           | 0.769       | 0.386           |
| 22.2500                                           | 0.769       | 0.364           |
| 24.8000                                           | 0.769       | 0.341           |
| 26.0500                                           | 0.731       | 0.341           |
| 27.0000                                           | 0.692       | 0.341           |
| 27.3000                                           | 0.654       | 0.341           |
| 28.1000                                           | 0.654       | 0.318           |
| 29.2000                                           | 0.654       | 0.295           |
| 30.0000                                           | 0.654       | 0.273           |
| 32.1000                                           | 0.654       | 0.250           |
| 33.8500                                           | 0.615       | 0.250           |
| 35.5500                                           | 0.615       | 0.227           |
| 38.7500                                           | 0.577       | 0.227           |
| 40.6500                                           | 0.577       | 0.205           |
| 43.9000                                           | 0.538       | 0.205           |
| 47.6000                                           | 0.538       | 0.182           |
| 48.9500                                           | 0.538       | 0.159           |
| 49.6000                                           | 0.500       | 0.159           |
| 50.5500                                           | 0.462       | 0.159           |
| 52.3000                                           | 0.423       | 0.159           |
| 53.9000                                           | 0.423       | 0.136           |
| 55.5500                                           | 0.385       | 0.136           |
| 56.6000                                           | 0.346       | 0.136           |
| 61.2000                                           | 0.346       | 0.114           |
| 66.0500                                           | 0.308       | 0.114           |
| 69.5000                                           | 0.269       | 0.114           |
| 75.8000                                           | 0.269       | 0.091           |
| 81.0000                                           | 0.231       | 0.091           |
| 84.7500                                           | 0.192       | 0.091           |
| 91.2500                                           | 0.192       | 0.068           |
| 97.3500                                           | 0.154       | 0.068           |
| 99.7500                                           | 0.115       | 0.045           |
| 108.5000                                          | 0.077       | 0.045           |
| 125.1000                                          | 0.038       | 0.045           |
| 134.6000                                          | 0.000       | 0.045           |
| 147.7000                                          | 0.000       | 0.023           |
| 161.2000                                          | 0.000       | 0.000           |

The test result variable(s): NK CD8+ has at least one tie between the positive actual state group and the negative actual state group.

a. The smallest cutoff value is the minimum observed test value minus 1, and the largest cutoff value is the maximum observed test value plus 1. All the other cutoff values are the averages of two consecutive ordered observed test values.

| <b>Coordinates of the ROC Curve NK CD8-</b>       |             |                 |
|---------------------------------------------------|-------------|-----------------|
| Test Result Variable(s):                          |             |                 |
| Positive if Greater Than or Equal To <sup>a</sup> | Sensitivity | 1 - Specificity |
| 16.2000                                           | 1.000       | 1.000           |
| 18.2000                                           | 0.957       | 1.000           |
| 19.3000                                           | 0.957       | 0.977           |
| 19.5000                                           | 0.957       | 0.953           |
| 21.2000                                           | 0.957       | 0.930           |
| 25.7500                                           | 0.957       | 0.907           |
| 29.1500                                           | 0.957       | 0.884           |
| 30.5500                                           | 0.957       | 0.860           |
| 33.1500                                           | 0.957       | 0.837           |
| 36.3000                                           | 0.957       | 0.814           |
| 38.1000                                           | 0.957       | 0.791           |
| 39.4000                                           | 0.957       | 0.767           |
| 40.7500                                           | 0.957       | 0.744           |
| 44.5500                                           | 0.957       | 0.721           |
| 49.2000                                           | 0.957       | 0.698           |
| 51.5500                                           | 0.957       | 0.674           |
| 52.8000                                           | 0.913       | 0.674           |
| 53.4500                                           | 0.870       | 0.674           |
| 57.6000                                           | 0.870       | 0.651           |
| 63.0000                                           | 0.870       | 0.628           |
| 64.9500                                           | 0.870       | 0.605           |
| 65.4000                                           | 0.870       | 0.581           |
| 66.4500                                           | 0.826       | 0.581           |
| 70.6000                                           | 0.783       | 0.581           |
| 74.4000                                           | 0.783       | 0.558           |
| 75.5000                                           | 0.739       | 0.558           |
| 76.6000                                           | 0.696       | 0.558           |
| 77.2500                                           | 0.696       | 0.535           |
| 77.7500                                           | 0.696       | 0.512           |
| 80.6000                                           | 0.696       | 0.488           |
| 84.6500                                           | 0.696       | 0.465           |
| 87.0500                                           | 0.652       | 0.465           |
| 91.9500                                           | 0.652       | 0.442           |
| 97.3500                                           | 0.652       | 0.395           |
| 99.2000                                           | 0.652       | 0.372           |
| 100.6500                                          | 0.609       | 0.372           |
| 106.0500                                          | 0.565       | 0.372           |
| 112.0000                                          | 0.565       | 0.349           |
| 118.9500                                          | 0.522       | 0.349           |
| 126.4000                                          | 0.522       | 0.326           |
| 129.3500                                          | 0.478       | 0.326           |
| 133.5000                                          | 0.435       | 0.326           |
| 137.7000                                          | 0.435       | 0.302           |
| 139.8000                                          | 0.391       | 0.302           |
| 141.9000                                          | 0.348       | 0.302           |
| 144.0000                                          | 0.304       | 0.302           |
| 151.4500                                          | 0.304       | 0.279           |
| 159.8500                                          | 0.261       | 0.279           |
| 163.8000                                          | 0.261       | 0.256           |
| 175.2000                                          | 0.261       | 0.233           |
| 185.3500                                          | 0.261       | 0.209           |
| 186.1000                                          | 0.217       | 0.209           |
| 188.1500                                          | 0.217       | 0.186           |
| 191.8000                                          | 0.174       | 0.186           |
| 199.1000                                          | 0.174       | 0.163           |
| 215.1000                                          | 0.174       | 0.140           |
| 232.9500                                          | 0.174       | 0.116           |
| 243.0000                                          | 0.174       | 0.093           |
| 249.6000                                          | 0.174       | 0.070           |
| 254.1500                                          | 0.174       | 0.047           |
| 267.8000                                          | 0.130       | 0.047           |
| 284.4000                                          | 0.130       | 0.023           |
| 295.2000                                          | 0.087       | 0.023           |
| 338.8000                                          | 0.043       | 0.023           |
| 403.8500                                          | 0.000       | 0.023           |
| 433.5000                                          | 0.000       | 0.000           |

a. The smallest cutoff value is the minimum observed test value minus 1, and the largest cutoff value is the maximum observed test value plus 1. All the other cutoff values are the averages of two consecutive ordered observed test values.
